# Supplementary material for: A Novel 18-Marker Panel Predicting Clinical Outcome in Breast Cancer
Source: Oxford University Press journal article supplement (doi:10.1158/1055-9965.epi-17-0606), 2017-09-07
Supplement: 10559965epi170606-sup-185589_2_supp_4234744_tv8vc3.xlsx [file 10559965epi170606-sup-185589_2_supp_4234744_tv8vc3.xlsx]

## Sheet: Sheet1
Supplementary Table S4. Clinicopathological characteristics of the 79-patient subgroup with confounding factors stratified by linear predictor (risk group). Categorical variables show the total number of patients and percentage in parentheses, while continuous variables are given as the mean and standard deviation. Statistically significant variables (P <0.05) are displayed in bold text.
	No. of patients (%)
	Total (n = 79)	High-risk group (n = 37)	Low-risk group (n = 42)	p-value
Breast cancer-related death	35 (44.3)	30 (81.1)	5 (11.9)	<0.001
Cause of death				<0.001
Breast cancer	35 (44.3)	30 (81.1)	5 (11.9)
Other	2 (2.5)	1 (2.7)	1 (2.4)
Alive	42 (53.2)	6 (16.2)	36 (85.7)
Follow-up time (days)	3263.61 (1697.70)	2105.43 (1487.86)	4283.90 (1123.62)	<0.001
Age (years)	56.92 (13.22)	55.97 (15.53)	57.76 (10.92)	0.552
Tumour size (mm)	33.62 (29.48)	32.68 (15.15)	34.45 (38.08)	0.791
Pathological tumour status				0.772
pT1	17 (21.5)	7 (18.9)	10 (23.8)
pT2	42 (53.2)	21 (56.8)	21 (50.0)
pT3	16 (20.3)	7 (18.9)	9 (21.4)
pT4c	1 (1.3)	0 (0.0)	1 (2.4)
pT4d	3 (3.8)	2 (5.4)	1 (2.4)
Histology				0.696
ductal	56 (70.9)	25 (67.6)	31 (73.8)
lobular	9 (11.4)	4 (10.8)	5 (11.9)
other	14 (17.7)	8 (21.6)	6 (14.3)
ER				0.07
Negative	12 (15.2)	9 (24.3)	3 (7.1)
Positive	67 (84.8)	28 (75.7)	39 (92.9)
PR				0.021
Negative	29 (36.7)	19 (51.4)	10 (23.8)
Positive	50 (63.3)	18 (48.6)	32 (76.2)
HER2				1
Negative	72 (91.1)	34 (91.9)	38 (90.5)
Positive	7 (8.9)	3 (8.1)	4 (9.5)
Surgery				0.388
Lumpectomy	24 (30.4)	9 (24.3)	15 (35.7)
Mastectomy	40 (50.6)	19 (51.4)	21 (50.0)
Not available	15 (19.0)	9 (24.3)	6 (14.3)
Endocrine treatment				0.262
No	11 (13.9)	7 (18.9)	4 (9.5)
Yes	8 (10.1)	5 (13.5)	3 (7.1)
Not available	60 (75.9)	25 (67.6)	35 (83.3)
Radiotherapy				0.514
No	38 (48.1)	16 (43.2)	22 (52.4)
Yes	24 (30.4)	11 (29.7)	13 (31.0)
Not available	17 (21.5)	10 (27.0)	7 (16.7)
Chemotherapy				0.529
No	42 (53.2)	18 (48.6)	24 (57.1)
Yes	20 (25.3)	9 (24.3)	11 (26.2)
Not available	17 (21.5)	10 (27.0)	7 (16.7)
Molecular subtypes				0.199
Basal-like	5 (6.3)	4 (10.8)	1 (2.4)
HER2/ER-	7 (8.9)	5 (13.5)	2 (4.8)
Luminal subtype A	2 (2.5)	1 (2.7)	1 (2.4)
Luminal subtype B	65 (82.3)	27 (73.0)	38 (90.5)
Axillary lymph node status				0.751
pN0	38 (48.1)	19 (51.4)	19 (45.2)
pN1	41 (51.9)	18 (48.6)	23 (54.8)
Lymph node ratio	0.20 (0.32)	0.27 (0.38)	0.13 (0.23)	0.051
SBR grade				0.003
I	13 (16.5)	1 (2.7)	12 (28.6)
II	47 (59.5)	23 (62.2)	24 (57.1)
III	19 (24.1)	13 (35.1)	6 (14.3)
Genomic Grade Index				0.001
high	37 (46.8)	22 (59.5)	15 (35.7)
low	30 (38.0)	6 (16.2)	24 (57.1)
Not available	12 (15.2)	9 (24.3)	3 (7.1)
Oncotype Dx				<0.001
High-risk group	44 (55.7)	11 (29.7)	33 (78.6)
Low-risk group	35 (44.3)	26 (70.3)	9 (21.4)
DNA index	1.02 (0.15)	1.02 (0.15)	1.02 (0.15)	0.988
Ploidy status				1
Aneuploid	2 (2.5)	1 (2.7)	1 (2.4)
Diploid	77 (97.5)	36 (97.3)	41 (97.6)
