# Supplementary material for: A Novel 18-Marker Panel Predicting Clinical Outcome in Breast Cancer
Source: Oxford University Press journal article supplement (doi:10.1158/1055-9965.epi-17-0606), 2017-09-07
Supplement: 10559965epi170606-sup-185589_2_supp_4234753_yv8vc4.xlsx [file 10559965epi170606-sup-185589_2_supp_4234753_yv8vc4.xlsx]

## Sheet: Sheet1
	Supplementary Table S1. Clinicopathological characteristics of the breast cancer patients with statistics for confounding factors stratified by linear predictor (risk group) in the (A) GSE1456, (B) GSE4922, and (C) TCGA validation cohort. Categorical variables show the total number of patients and percentage in parentheses, while continuous variables are given as the mean and standard deviation. …
A
	GSE1456	No. of patients (%)
		Total (n = 128)	High-risk group (n = 59)	Low-risk group (n = 69)	p-value
	Breast cancer-related death	25 (19.5)	20 (33.9)	5 (7.2)	<0.001
	Follow-up time (years)	6.36 (1.9)	5.79 (2.1)	6.85 (1.6)	0.001
	Molecular subtypes				<0.001
	Basal	23 (18.0)	19 (32.2)	4 (5.8)
	ERBB2	14 (10.9)	11 (18.6)	3 (4.3)
	Luminal A	33 (25.8)	7 (11.9)	26 (37.7)
	Luminal B	22 (17.2)	15 (25.4)	7 (10.1)
	Normal-like	36 (28.1)	7 (11.9)	29 (42.0)
	Grade				<0.001
	I	23 (18.0)	3 (5.1)	20 (29.0)
	II	46 (35.9)	13 (22.0)	33 (47.8)
	III	59 (46.1)	43 (72.9)	16 (23.2)
B
	GSE4922	No. of patients (%)
		Total (n = 237)	High-risk group (n = 112)	Low-risk group (n = 125)	p-value
	Relapse or breast cancer-related death	88 (37.1)	60 (53.6)	28 (22.4)	<0.001
	Follow-up time (years)	7.28 (4.27)	5.85 (4.43)	8.56 (3.69)	<0.001
	ER		92 (82.1)	113 (90.4)	0.096
	Negative	32 (13.5)
	Positive	205 (86.5)
	Lymph node status				0.024
	Negative	156 (65.8)	65 (58.0)	91 (72.8)
	Positive	81 (34.2)	47 (42.0)	34 (27.2)
	Age (years)	61.32 (13.59)	61.92 (14.67)	60.78 (12.57)	0.522
	Tumour size (mm)	22.40 (12.78)	24.10 (11.13)	20.87 (13.96)	0.052
C
	TCGA cohort	No. of patients (%)
		Total (n = 720)	High-risk group (n = 357)	Low-risk group (n = 363)	p-value
	Deceased	76 (10.6)	54 (15.1)	22 (6.1)	<0.001
	Follow-up time (days)	979.96 (1075.3)	996.72 (1042.7)	963.48 (1107.6)	0.679
	Age (years)	57.19 (12.7)	55.75 (13.0)	58.61 (12.3)	0.003
	Tumour size				0.009
	T1	36 (5.0)	22 (6.2)	14 (3.9)
	T1b	9 (1.2)	3 (0.8)	6 (1.7)
	T1c	159 (22.1)	58 (16.2)	101 (27.8)
	T2	402 (55.8)	219 (61.3)	183 (50.4)
	T3	94 (13.1)	44 (12.3)	50 (13.8)
	T3a	1 (0.1)	0 (0.0)	1 (0.3)
	T4	5 (0.7)	3 (0.8)	2 (0.6)
	T4b	13 (1.8)	7 (2.0)	6 (1.7)
	T4d	1 (0.1)	1 (0.3)	0 (0.0)
	ER				0.203
	Negative	166 (23.1)	90 (25.5)	76 (20.9)
	Positive	554 (76.9)	267 (74.8)	287 (79.1)
	PR				0.178
	Negative	238 (33.1)	127 (35.6)	111 (30.6)
	Positive	482 (66.9)	230 (64.4)	252 (69.4)
	Number of positive lymph nodes	2.33 (4.50)	2.58 (4.75)	2.07 (4.23)	0.128
